# Supplementary material
Source: Springer Nature journal article supplement (https://www.springermedizin.de/resource/supplementary/13054_2011_9620_MOESM1_ESM.pdf/9706584)

(A)

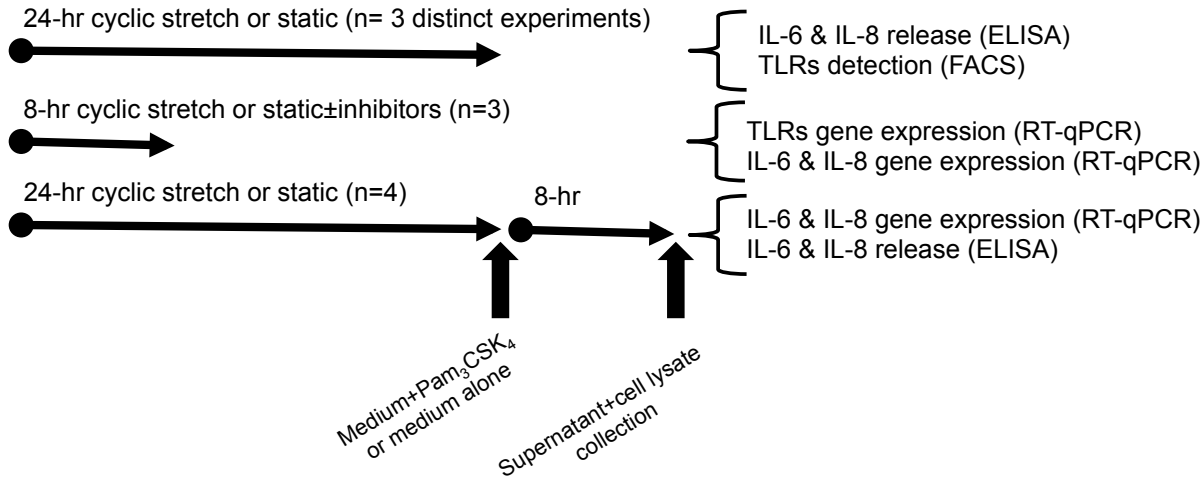

(B)

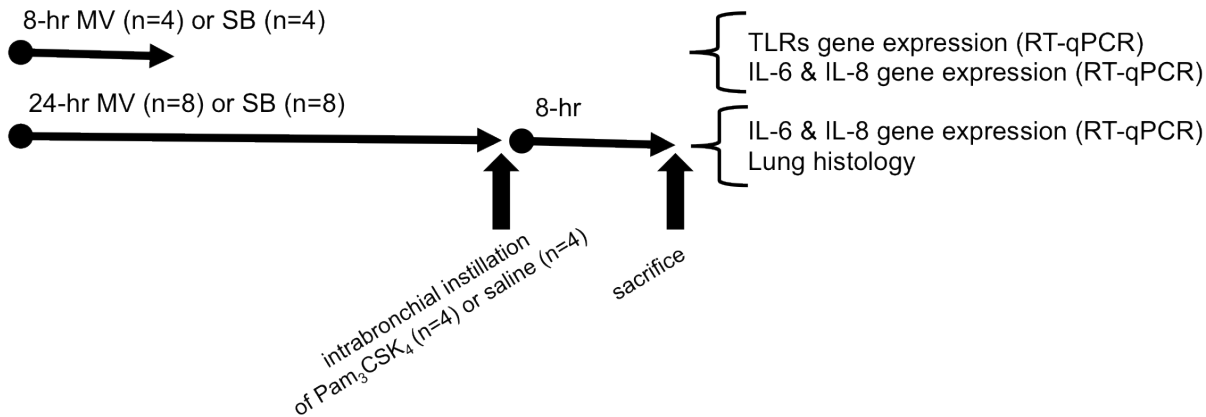

Supplement: MOESM1 [file 9706584]
